# Supplementary material
Source: PubMed Central journal article supplement (PMC1691118)
Supplement: 12350246s01.pdf [file 12350246s01.pdf]

This is an electronic appendix to the paper by Stenseth *et al.* 2002 Interaction between seasonal density-dependence structures and length of the seasons explain the geographical structure of the dynamics of voles in Hokkaido: an example of seasonal forcing. *Proc. R. Soc. Lond. B* **269**, 1853—1863.

Electronic appendices are reviewed with the text. However, no attempt is made to impose a uniform editorial style on the electronic appendices.

## Electronic appendix A.

### Contents

Supplementary table 1 (the stations used and the predicted  $\tau$ )

Supplementary tables 2 and 3 (together with some background methodological text): the linear approximation based upon the simplifying assumption of Stenseth *et al.* (1998).

**Supplementary table 1:** Relative length of summer season [ $\tau$ , equations (2b) and (2c)] and mean estimates (*i.e.*, mean of posterior distributions) of direct ( $\alpha_1$ ) and delayed ( $\alpha_2$ ) annual density dependence. (The direct and delayed density dependence are estimated from equation (1) incorporating a statistical observation model (and thus accounting for sampling variance; see equations (A1)-(A3)). Estimates are given for each of 189 sites within eight groups (see figure 1). The location of each population is indicated by altitude ( $h$ ) and positions in the west-to-east ( $g_{we}$ ) and south-to-north ( $g_{sn}$ ) direction (the unit of which being 1 corresponding to 2 km for  $g_{we}$  and  $g_{sn}$  and 10 m for  $h$ ). ‘Group’ is the variable into which each time series is grouped according to topography (see Fig. 1).

| Code | Office        | Group | $g_{we}$ | $g_{sn}$ | $h$ | $\tau$ | $\alpha_1$ | $\alpha_2$ |
|------|---------------|-------|----------|----------|-----|--------|------------|------------|
| 101  | Wakkanai      | 1     | 74.3     | 222.5    | 75  | 0.4042 | 0.0591     | 0.4166     |
| 201  | Hamatonbetsu  | 2     | 89.5     | 213.5    | 100 | 0.4046 | -0.3765    | -0.4411    |
| 202  | Onishibetsu   | 2     | 82.7     | 220.0    | 200 | 0.4035 | 0.3570     | 0.0151     |
| 203  | Shirikibetsu  | 2     | 81.2     | 226.0    | 50  | 0.4006 | -0.3328    | 0.0150     |
| 205  | Asagino       | 2     | 83.8     | 213.9    | 50  | 0.4063 | -0.0517    | -0.1153    |
| 301  | Nakatonbetsu  | 2     | 93.4     | 206.3    | 150 | 0.4062 | 0.0910     | -0.4517    |
| 302  | Shimotonbetsu | 2     | 90.8     | 208.2    | 100 | 0.4065 | 0.3439     | -0.4062    |
| 303  | Usotan        | 2     | 98.2     | 209.5    | 300 | 0.4031 | 0.3241     | -0.2148    |
| 304  | Heian         | 2     | 96.4     | 204.0    | 100 | 0.4059 | 0.0404     | -0.6334    |
| 401  | Esashi        | 2     | 103.2    | 204.6    | 300 | 0.4027 | -0.5572    | -0.6042    |
| 402  | Utanobori     | 2     | 100.0    | 202.9    | 100 | 0.4047 | -0.0316    | -0.3141    |
| 403  | Ketobetsu     | 2     | 96.7     | 196.1    | 200 | 0.4087 | -0.0637    | -0.4431    |
| 404  | Shibiutan     | 2     | 103.2    | 193.3    | 400 | 0.4061 | -0.3343    | -0.3079    |
| 410  | Esashi2       | 2     | 106.6    | 189.0    | 350 | 0.4054 | -0.2215    | -0.2453    |
| 501  | Teshio        | 1     | 74.6     | 201.5    | 50  | 0.4170 | 0.4593     | -0.0317    |
| 502  | Oshinnai      | 1     | 79.9     | 196.6    | 100 | 0.4173 | 0.2432     | -0.1941    |
| 503  | Horonobe      | 1     | 80.0     | 209.1    | 150 | 0.4103 | 0.0463     | 0.3024     |

|      |                |   |       |       |      |        |         |         |
|------|----------------|---|-------|-------|------|--------|---------|---------|
| 504  | Toyotomi       | 1 | 79.1  | 212.9 | 100  | 0.4084 | 0.2557  | 0.1685  |
| 601  | Nayoro         | 2 | 106.6 | 174.9 | 400  | 0.4091 | -0.2771 | -0.2278 |
| 602  | Nakagawa       | 1 | 84.0  | 196.2 | 250  | 0.4153 | 0.6056  | -0.1166 |
| 603  | Saku           | 1 | 83.6  | 191.8 | 100  | 0.4178 | -0.0743 | -0.7437 |
| 604  | Kyowa          | 1 | 88.2  | 187.5 | 200  | 0.4172 | -0.1098 | -0.3913 |
| 605  | Yamato         | 1 | 86.0  | 183.9 | 300  | 0.4204 | 0.2258  | -0.0550 |
| 607  | Furen          | 2 | 106.8 | 165.1 | 400  | 0.4116 | 0.2258  | -0.0550 |
| 701  | Maesanru       | 2 | 109.8 | 174.2 | 100  | 0.4069 | 0.1223  | 0.2874  |
| 702  | Mikuruma       | 2 | 112.5 | 175.7 | 250  | 0.4045 | 0.0738  | 0.0946  |
| 703  | Okusanru       | 2 | 114.9 | 177.6 | 300  | 0.4024 | -0.1280 | -0.1991 |
| 704  | Ninohashi      | 2 | 113.5 | 168.4 | 400  | 0.4052 | -0.0801 | -0.5030 |
| 705  | Panke          | 2 | 112.3 | 165.6 | 300  | 0.4067 | 0.1479  | -0.2533 |
| 800  | Shin           | 2 | 113.1 | 171.7 | 400  | 0.4049 | -0.0563 | -0.3114 |
| 801  | Shikaribetsu   | 2 | 115.3 | 175.0 | 300  | 0.4026 | -0.0607 | -0.3610 |
| 802  | Ichinohashi    | 2 | 115.3 | 172.3 | 300  | 0.4030 | -0.5482 | -0.5370 |
| 901  | Onnebetsu      | 2 | 94.7  | 163.3 | 250  | 0.4228 | -0.0713 | 0.0506  |
| 902  | Wassamu        | 2 | 102.8 | 154.4 | 300  | 0.4184 | 0.2894  | 0.0888  |
| 903  | Kamishibetsu   | 2 | 106.4 | 161.0 | 300  | 0.4130 | 0.1530  | -0.1043 |
| 1001 | Kitashibetsu   | 2 | 110.3 | 160.6 | 300  | 0.4096 | 0.1671  | -0.1265 |
| 1003 | Mitsumata      | 2 | 111.6 | 156.6 | 400  | 0.4092 | -0.0174 | -0.5932 |
| 1005 | Nisama         | 2 | 118.0 | 159.6 | 200  | 0.4027 | 0.0584  | -0.1842 |
| 1006 | Nakateshio     | 2 | 115.0 | 156.2 | 500  | 0.4061 | -0.1278 | -0.3199 |
| 1101 | Kamikawa       | 5 | 117.8 | 147.5 | 500  | 0.4046 | 0.1220  | -0.2552 |
| 1104 | Kiyokawa       | 5 | 124.2 | 140.0 | 700  | 0.3985 | 0.0063  | -0.1254 |
| 1110 | Kamikawa2      | 5 | 124.0 | 147.3 | 500  | 0.3982 | 0.1245  | 0.1292  |
| 1202 | Rubeshinai     | 5 | 130.2 | 134.0 | 1000 | 0.3918 | 0.2052  | -0.2750 |
| 1204 | Ishikari       | 5 | 125.4 | 131.9 | 1000 | 0.3976 | 0.2196  | -0.3931 |
| 1302 | Etanbetsu      | 5 | 95.8  | 146.5 | 200  | 0.4283 | 0.3474  | -0.1199 |
| 1304 | Aibetsu        | 5 | 111.3 | 150.0 | 250  | 0.4110 | -0.4243 | -0.2292 |
| 1310 | Asahikawa2     | 5 | 106.5 | 151.1 | 600  | 0.4156 | -0.5658 | -0.3635 |
| 1401 | Nishikagura    | 5 | 100.8 | 132.5 | 300  | 0.4276 | -0.3858 | -0.1449 |
| 1402 | Kamuikotan     | 5 | 97.4  | 137.7 | 500  | 0.4299 | -0.2908 | -0.2792 |
| 1501 | Ebishima       | 1 | 83.2  | 145.8 | 200  | 0.4424 | 0.6423  | -0.3636 |
| 1503 | Fukagawa       | 1 | 80.0  | 137.6 | 100  | 0.4505 | 0.1639  | 0.0430  |
| 1601 | Takatomari     | 1 | 89.9  | 146.3 | 200  | 0.4348 | 0.6252  | -0.6047 |
| 1602 | Horokanai      | 1 | 89.7  | 152.4 | 400  | 0.4322 | 0.1321  | -0.3464 |
| 1604 | Seiwa          | 1 | 89.3  | 157.0 | 500  | 0.4305 | 0.2108  | 0.5553  |
| 1605 | Shumarinai     | 1 | 88.9  | 168.1 | 400  | 0.4258 | 0.1560  | 0.3577  |
| 1701 | Rubeshibe      | 5 | 102.9 | 126.9 | 500  | 0.4268 | 0.1892  | 0.3940  |
| 1703 | Biei           | 5 | 115.7 | 124.7 | 800  | 0.4107 | 0.3246  | -0.2063 |
| 1801 | Furano         | 5 | 103.7 | 120.0 | 800  | 0.4278 | -0.0586 | -0.4047 |
| 1803 | Furebetsu      | 5 | 114.3 | 119.1 | 700  | 0.4135 | 0.1234  | -0.2228 |
| 1901 | Kanayama       | 5 | 106.6 | 102.7 | 500  | 0.4285 | 0.1117  | -0.2691 |
| 1903 | Nishishimcup   | 5 | 104.7 | 99.3  | 600  | 0.4325 | 0.2426  | -0.4982 |
| 1904 | Higashishimcup | 5 | 108.9 | 98.9  | 500  | 0.4259 | -0.0555 | -0.3743 |
| 1905 | Soshubetsu     | 5 | 112.2 | 95.5  | 500  | 0.4213 | 0.3792  | -0.0778 |
| 1906 | Niniu          | 5 | 104.3 | 93.4  | 500  | 0.4349 | 0.2251  | -0.3216 |
| 2001 | Ikutora        | 5 | 111.2 | 104.8 | 500  | 0.4209 | -0.1113 | -0.5024 |
| 2002 | Ochiai         | 5 | 117.1 | 102.2 | 700  | 0.4123 | 0.6200  | 0.0164  |
| 2003 | Okuochiai      | 5 | 117.3 | 114.4 | 750  | 0.4101 | 0.2918  | -0.1599 |
| 2004 | Kamitomamu     | 5 | 114.9 | 99.4  | 800  | 0.4162 | 0.3496  | 0.1452  |
| 2005 | Shimotomam     | 5 | 112.8 | 102.1 | 500  | 0.4190 | -0.0225 | -0.5667 |
| 2201 | Shimokinen     | 1 | 81.2  | 151.2 | 150  | 0.4416 | 0.3554  | 0.2388  |

|       |               |   |       |       |      |        |         |         |
|-------|---------------|---|-------|-------|------|--------|---------|---------|
| 2202  | Tappu         | 1 | 79.3  | 155.0 | 200  | 0.4414 | -0.0146 | 0.3861  |
| 2203  | Takishita     | 1 | 82.9  | 153.7 | 300  | 0.4385 | 0.1697  | 0.1874  |
| 2204  | Kawakami      | 1 | 84.9  | 156.7 | 400  | 0.4349 | 0.0697  | -0.0584 |
| 2301  | Kotanbetsu    | 1 | 78.5  | 161.8 | 150  | 0.4382 | -0.1488 | 0.0763  |
| 2302  | Okukotan      | 1 | 83.6  | 161.2 | 300  | 0.4338 | -0.3111 | -0.2757 |
| 2303  | Sankei        | 1 | 77.2  | 159.2 | 200  | 0.4409 | 0.4752  | 0.0971  |
| 2304  | Okusankei     | 1 | 80.8  | 159.5 | 300  | 0.4374 | -0.0543 | 0.1874  |
| 2401  | Haboro        | 1 | 78.7  | 167.8 | 100  | 0.4345 | 0.1538  | 0.3442  |
| 2403  | Chikubetsu    | 1 | 78.9  | 172.2 | 100  | 0.4318 | 0.1850  | 0.1341  |
| 2404  | Okuchikubetsu | 1 | 80.6  | 175.2 | 200  | 0.4288 | -0.1734 | 0.1653  |
| 2405  | Shosanbetsu   | 1 | 79.1  | 176.9 | 200  | 0.4290 | -0.1202 | 0.0757  |
| 2406  | Toyomisaki    | 1 | 79.1  | 179.9 | 250  | 0.4272 | 0.1722  | -0.1389 |
| 2501  | Enbetsu       | 1 | 78.8  | 187.9 | 200  | 0.4228 | 0.4459  | 0.2948  |
| 2502  | Nishienbetsu  | 1 | 82.8  | 178.5 | 300  | 0.4253 | 0.2714  | 0.3176  |
| 10103 | Yuni          | 4 | 82.3  | 93.6  | 150  | 0.4718 | 0.6848  | -0.2944 |
| 10303 | Kaede         | 4 | 94.0  | 93.7  | 400  | 0.4520 | 0.4575  | 0.0429  |
| 10304 | Keiritsu      | 4 | 89.1  | 92.9  | 150  | 0.4606 | 0.3578  | -0.1575 |
| 10305 | Maeyubari     | 4 | 94.6  | 99.9  | 600  | 0.4485 | 0.4381  | -0.3271 |
| 10308 | Yubaridake    | 4 | 98.8  | 99.5  | 500  | 0.4419 | -0.2142 | -0.1092 |
| 10309 | Nanbu         | 4 | 95.7  | 96.8  | 400  | 0.4480 | 0.1428  | -0.3509 |
| 10310 | Kawabata      | 4 | 92.1  | 89.9  | 300  | 0.4569 | 0.2367  | -0.5086 |
| 10311 | Shimizusawa   | 4 | 91.4  | 96.0  | 200  | 0.4554 | 0.5109  | -0.7676 |
| 10401 | Mitsuiwa      | 7 | 107.9 | 85.1  | 600  | 0.4310 | -0.1486 | -0.2176 |
| 10402 | Hidaka        | 7 | 110.2 | 91.2  | 500  | 0.4256 | 0.2735  | 0.0234  |
| 10403 | Chiroro       | 7 | 115.7 | 85.9  | 750  | 0.4172 | 0.1289  | -0.7292 |
| 10404 | Senei         | 7 | 116.9 | 91.3  | 1000 | 0.4143 | 0.1633  | 0.0204  |
| 10405 | Nissho        | 7 | 119.1 | 94.6  | 1000 | 0.4102 | 0.3710  | -0.0313 |
| 10407 | Nukabira      | 7 | 110.5 | 82.9  | 200  | 0.4269 | 0.3870  | -0.0160 |
| 10501 | Furenai       | 7 | 105.9 | 82.8  | 400  | 0.4352 | -0.0025 | -0.2909 |
| 10502 | Niseu         | 7 | 105.4 | 86.4  | 400  | 0.4350 | 0.3861  | 0.0768  |
| 10503 | Horoshiri     | 7 | 114.6 | 83.5  | 800  | 0.4195 | -0.0281 | -0.2131 |
| 10504 | Shukushubetsu | 7 | 111.7 | 78.6  | 750  | 0.4257 | 0.1115  | -0.0680 |
| 10505 | Nukibetsu     | 7 | 102.7 | 76.3  | 150  | 0.4429 | 0.1789  | -0.5925 |
| 10601 | Atsuga        | 7 | 104.4 | 65.2  | 200  | 0.4431 | 0.3129  | -0.0951 |
| 10604 | Miu           | 7 | 108.7 | 71.7  | 500  | 0.4329 | -0.0757 | -0.4726 |
| 10701 | Nishigvoen    | 7 | 119.7 | 66.4  | 500  | 0.4127 | 0.0083  | -0.4315 |
| 10702 | Higashigvoen  | 7 | 116.6 | 70.1  | 500  | 0.4181 | 0.0015  | -0.3853 |
| 10703 | Okushizunai   | 7 | 125.3 | 71.3  | 900  | 0.4016 | 0.4246  | -0.1386 |
| 10801 | Nisha         | 7 | 129.5 | 62.2  | 300  | 0.3939 | -0.5390 | -0.4140 |
| 10804 | Utafue        | 7 | 122.5 | 64.0  | 500  | 0.4075 | 0.0482  | -0.1005 |
| 10901 | Tomakomai     | 6 | 72.6  | 78.2  | 50   | 0.4984 | 0.3233  | -0.0457 |
| 10902 | Itoi          | 6 | 71.2  | 76.4  | 150  | 0.5022 | 0.2624  | -0.5202 |
| 10903 | Kitashikotsu  | 6 | 61.1  | 80.9  | 500  | 0.5177 | 0.0686  | -0.2996 |
| 10904 | Hobetsu       | 7 | 98.5  | 80.8  | 200  | 0.4492 | -0.1767 | -0.0689 |
| 10906 | Tominai       | 7 | 101.5 | 85.7  | 400  | 0.4421 | -0.0790 | -0.2443 |
| 10907 | Maruyama      | 6 | 68.5  | 80.0  | 100  | 0.5048 | 0.2457  | 0.1270  |
| 11001 | Tarumae       | 6 | 67.3  | 73.8  | 300  | 0.5114 | 0.0744  | -0.4340 |
| 11002 | Shiraoi       | 6 | 61.4  | 74.0  | 400  | 0.5226 | -0.5273 | -0.1107 |
| 11003 | Takeura       | 6 | 57.9  | 68.0  | 400  | 0.5342 | 0.2551  | 0.4910  |
| 11101 | Eniwa         | 6 | 64.4  | 84.5  | 400  | 0.5090 | -0.0662 | 0.3189  |
| 11204 | Hiroshima     | 6 | 71.8  | 95.8  | 50   | 0.4881 | 0.0652  | -0.0756 |
| 11207 | Shiraigawa    | 6 | 52.3  | 92.9  | 500  | 0.5233 | 0.4360  | 0.3295  |
| 11209 | Nishimisumai  | 6 | 57.9  | 88.9  | 500  | 0.5170 | -0.1711 | 0.2453  |

|       |              |   |       |       |     |        |         |         |
|-------|--------------|---|-------|-------|-----|--------|---------|---------|
| 11212 | Ishiyama     | 6 | 65.2  | 91.1  | 200 | 0.5026 | 0.7243  | 0.1190  |
| 11301 | Yoichi       | 6 | 37.7  | 104.0 | 300 | 0.5365 | 0.3123  | -0.2033 |
| 11303 | Meiji        | 6 | 47.6  | 94.0  | 600 | 0.5303 | -0.8599 | -0.3991 |
| 11305 | Furubira     | 6 | 33.3  | 101.9 | 500 | 0.5457 | 0.3302  | -0.0504 |
| 20105 | Hokuyu       | 3 | 124.2 | 173.9 | 400 | 0.3960 | 0.0353  | -0.4149 |
| 20202 | Konomai      | 3 | 131.1 | 171.4 | 350 | 0.3907 | 0.1394  | -0.4223 |
| 20301 | Shirataki    | 3 | 134.4 | 148.3 | 750 | 0.3874 | -0.0460 | -0.1637 |
| 20303 | Okushirataki | 3 | 129.9 | 148.7 | 800 | 0.3920 | -0.0211 | 0.1833  |
| 20401 | Taki         | 3 | 138.8 | 147.2 | 500 | 0.3828 | 0.0711  | -0.1998 |
| 20402 | Muri         | 3 | 135.8 | 142.6 | 600 | 0.3856 | 0.0953  | 0.0116  |
| 20601 | Ankoku2      | 3 | 147.0 | 155.8 | 400 | 0.3758 | -0.1213 | -0.0800 |
| 20705 | Tanno        | 3 | 161.3 | 154.8 | 300 | 0.3622 | 0.5843  | -0.1298 |
| 20902 | Tsunemoto    | 3 | 145.2 | 136.6 | 800 | 0.3746 | -0.3136 | -0.2883 |
| 20903 | Katsuyama    | 3 | 145.8 | 131.0 | 500 | 0.3730 | 0.0403  | -0.0017 |
| 20904 | Asahi2       | 3 | 139.5 | 132.7 | 800 | 0.3807 | -0.3106 | -0.2792 |
| 21003 | Satomi       | 3 | 173.7 | 134.7 | 600 | 0.3420 | -0.0218 | -0.2724 |
| 21004 | Motogi       | 3 | 168.9 | 133.1 | 300 | 0.3467 | 0.1432  | -0.2573 |
| 21005 | Aioi         | 3 | 168.1 | 130.3 | 500 | 0.3466 | 0.1202  | -0.0813 |
| 21101 | Abashiri     | 3 | 174.4 | 158.7 | 100 | 0.3518 | -0.1845 | -0.4461 |
| 21103 | E-mokoto     | 3 | 176.3 | 144.1 | 300 | 0.3434 | -0.0149 | -0.4535 |
| 21106 | Tokusahara   | 3 | 183.2 | 145.8 | 200 | 0.3373 | 0.1082  | -0.7589 |
| 21200 | Satsugen     | 3 | 189.7 | 144.3 | 200 | 0.3300 | 0.1374  | -0.1024 |
| 21201 | Kiyosato2    | 3 | 192.9 | 145.7 | 500 | 0.3277 | 0.0710  | -0.3595 |
| 21302 | Koshikawa    | 3 | 197.1 | 151.1 | 250 | 0.3271 | -0.2118 | -0.1393 |
| 40101 | Ozawa        | 6 | 38.6  | 91.2  | 300 | 0.5483 | -0.0677 | 0.0782  |
| 40102 | Tomari       | 6 | 31.2  | 96.9  | 400 | 0.5546 | 0.4025  | 0.1920  |
| 40103 | Kamuenai     | 6 | 28.6  | 101.0 | 300 | 0.5542 | -0.0394 | -0.3677 |
| 40201 | Kucchan      | 6 | 43.0  | 90.2  | 500 | 0.5417 | -0.1076 | -0.4426 |
| 40202 | Kyogoku      | 6 | 49.4  | 88.2  | 800 | 0.5325 | 0.4227  | -0.1863 |
| 40203 | Rusutsu      | 6 | 52.1  | 74.5  | 500 | 0.5399 | -0.0852 | 0.1286  |
| 40204 | Kimobetsu    | 6 | 54.4  | 80.9  | 600 | 0.5300 | -0.1120 | 0.0920  |
| 40205 | Futaba       | 6 | 57.3  | 76.9  | 500 | 0.5280 | -0.1320 | -0.0071 |
| 40301 | Date         | 6 | 50.0  | 62.2  | 600 | 0.5550 | 0.3362  | 0.3140  |
| 40302 | Noboribetsu  | 6 | 54.2  | 64.3  | 500 | 0.5447 | -0.2420 | 0.2581  |
| 40303 | Ootaki       | 6 | 56.4  | 72.4  | 500 | 0.5335 | 0.2505  | -0.2039 |
| 40304 | Sobetsu      | 6 | 50.0  | 70.7  | 500 | 0.5473 | 0.2257  | -0.1537 |
| 40401 | Kuromatsunai | 8 | 19.7  | 69.9  | 300 | 0.6061 | 0.4814  | -0.1073 |
| 40402 | Suttsu       | 8 | 18.4  | 74.2  | 300 | 0.6033 | 0.5445  | -0.0997 |
| 40403 | Nagatoyo     | 8 | 16.8  | 70.0  | 300 | 0.6114 | 0.8131  | -0.3097 |
| 40404 | Motomachi    | 8 | 11.3  | 68.9  | 900 | 0.6230 | 1.0280  | -0.2359 |
| 40501 | Imagane      | 8 | 16.2  | 62.5  | 400 | 0.6217 | 0.1253  | 0.0830  |
| 40502 | Hanaishi     | 8 | 19.7  | 65.3  | 700 | 0.6116 | 0.7448  | 0.0291  |
| 40602 | E-setana     | 8 | 9.3   | 62.7  | 500 | 0.6346 | 0.6862  | -0.1954 |
| 40603 | Wakamatsu    | 8 | 9.9   | 51.0  | 200 | 0.6482 | 0.8422  | 0.0085  |
| 40604 | Futamata     | 8 | 4.3   | 53.1  | 350 | 0.6565 | 0.0507  | -0.5805 |
| 40702 | Yakumo       | 8 | 19.5  | 44.7  | 400 | 0.6362 | 0.6968  | -0.1797 |
| 40703 | Ozeki        | 8 | 16.3  | 51.0  | 400 | 0.6353 | 0.4026  | -0.1887 |
| 40704 | Oshamanbe    | 8 | 22.9  | 63.9  | 350 | 0.6071 | 0.5405  | 0.2786  |
| 40801 | Mori         | 8 | 33.1  | 38.3  | 400 | 0.6142 | 0.9372  | 0.1560  |
| 40802 | Komagatake   | 8 | 40.3  | 38.4  | 600 | 0.5982 | 0.3288  | -0.2445 |
| 40803 | Rakube       | 8 | 28.5  | 38.3  | 400 | 0.6243 | 0.5987  | -0.0274 |
| 40804 | Nanae        | 8 | 43.0  | 32.7  | 400 | 0.5976 | 0.8632  | 0.0558  |
| 40805 | Oono         | 8 | 34.1  | 33.8  | 550 | 0.6166 | 0.1338  | -0.1088 |

|       |            |   |      |      |     |        |        |         |
|-------|------------|---|------|------|-----|--------|--------|---------|
| 40901 | Otsube     | 8 | 22.2 | 36.0 | 200 | 0.6405 | 0.5336 | -0.3471 |
| 40902 | Sakaehama  | 8 | 19.3 | 37.7 | 250 | 0.6447 | 0.5142 | 0.2730  |
| 40903 | Kumaishi   | 8 | 16.3 | 41.1 | 450 | 0.6471 | 0.2617 | 0.3721  |
| 40904 | Taisei     | 8 | 8.8  | 46.0 | 500 | 0.6566 | 0.6317 | 0.2137  |
| 41101 | Kaminokuni | 8 | 22.0 | 23.1 | 300 | 0.6553 | 0.8720 | -0.3101 |
| 41102 | Yunotai    | 8 | 25.2 | 21.4 | 250 | 0.6499 | 0.4549 | -0.3762 |
| 41103 | Shinmyo    | 8 | 26.4 | 20.2 | 300 | 0.6485 | 0.2894 | -0.5052 |
| 41104 | Okuyunotai | 8 | 23.2 | 15.4 | 600 | 0.6611 | 0.4530 | -0.6020 |
| 41201 | Kikonai    | 8 | 29.0 | 20.7 | 250 | 0.6420 | 1.2780 | -0.2699 |
| 41202 | Yoshihari  | 8 | 26.9 | 16.1 | 100 | 0.6517 | 1.0110 | -0.0660 |
| 41203 | Shiriuchi  | 8 | 24.7 | 11.3 | 200 | 0.6620 | 0.7278 | 0.0506  |
| 41301 | Kamiiso    | 8 | 33.6 | 28.2 | 400 | 0.6236 | 0.4241 | -0.1417 |
| 41302 | Moheji     | 8 | 32.1 | 23.4 | 200 | 0.6320 | 0.4006 | 0.3636  |

### Analysis based on the simplifying assumption of Stenseth *et al.* (1998)

Assuming spring-densities to be mapped on to autumn-densities (as did Stenseth *et al.* 1998), we may approximate the annual model according to:

$$N_t = const \cdot N_{t-1} \cdot \exp[(-a_{s1}x_{t-1} - a_{s2}x_{t-2})\tau] \cdot \exp[(-a_{w1}x_{t-1} - a_{w2}x_{t-2})(1-\tau)] \quad (I)$$

where  $N_t$  is the density corresponding to  $x_t$  [*i.e.*,  $x_t = \log(N_t)$ ], and ‘const’ is some scaling parameter of no interest to us in the present context. Note that positive values for the parameters  $a_{s1}$  and  $a_{s2}$  represent negative (*i.e.*, typical) density-dependence.

Based on equation (I) the annual density-dependencies may be re-parameterised so as to incorporate the seasonal components [direct density dependence during summer ( $a_{s1}$ ) and during winter ( $a_{w1}$ ), and delayed density dependence during summer ( $a_{s2}$ ) and during winter ( $a_{w2}$ )]:

$$\alpha_1 = 1 - a_{w1} + (a_{w1} - a_{s1})\tau \quad (II)$$

$$\alpha_2 = -a_{w2} + (a_{w2} - a_{s2})\tau \quad (III)$$

[See Stenseth *et al.* (1998) for derivations].

Simplifying equations (II) and (III) gives:

$$\alpha_1 = c_0 + c_1 \tau \quad (\text{IV})$$

$$\alpha_2 = d_0 + d_1 \tau \quad (\text{V})$$

We computed  $\tau$  for a large number of  $b_2$ - $b_3$  combinations and estimated  $c_0$ ,  $c_1$ ,  $d_0$  and  $d_1$  for each combination using linear regression, as described in Appendix B. As the optimisation criterion for finding the parameters  $b_2$  and  $b_3$  we have essentially used one of three: either the  $R^2$ -product for equations (IV) and (V) or the corresponding average of the  $R^2$ 's; however, since we really want the overall dependency the former is to be preferred (see supplementary table 3 and figure B2; pubs.royalsoc web-site).

Using equations (II) and (III) we can, through linear regression, obtain the seasonal density-dependent components. We obtain:  $a_{w1} = 1 - c_0$ ,  $a_{s1} = 1 - c_1 - c_0$ ,  $a_{w2} = -d_0$  and  $a_{s2} = -d_1 - d_0$ . The corresponding variances, from which we obtain the standard errors of the estimates, are given as:  $\text{var}(a_{w1}) = \text{var}(c_0)$ ,  $\text{var}(a_{s1}) = \text{var}(c_0) + \text{var}(c_1) - 2\text{cov}(c_0, c_1)$ ,  $\text{var}(a_{w2}) = \text{var}(d_0)$ , and  $\text{var}(a_{s2}) = \text{var}(d_0) + \text{var}(d_1) - 2\text{cov}(d_0, d_1)$ .

**Supplementary table 2:** Estimating the seasonal density-dependent structure from the relationships between the annual density-dependent structure and the relative length of the summer, assuming that the spring densities can be mapped on to the autumn densities. (Apart from this simplifying assumption, this table corresponds to table 2 in the article. Results from the linear regression of  $\alpha_i$  on  $\tau$ , where  $c_0$  and  $d_0$  are the estimated intercepts and  $c_1$  and  $d_1$  the estimated slopes of the regression equations corresponding to equations (IV) and (V) respectively (see, e.g., Sokal & Rohlf 1995). Reported values are from the best model given by the average of the two  $R^2$  values. (When the  $R^2$  product was maximized instead, the estimated values for  $c_0$ ,  $c_1$ ,  $d_0$  and  $d_1$  were 0.69, 1.58, -0.54, and 0.74, respectively). Values for  $a_{wi}$  and  $a_{si}$  (for  $i = 1, 2$ ) were calculated using the relationships described under 'A seasonal model: re-parameterising the annual model and seasonal forcing'. Confidence intervals are based on estimates +/- 1.96 standard errors.)

**(1) Direct density dependencies ( $\alpha_i$  regressed on  $\tau$ ).**

(Residual error = 0.284;  $df = 187$ ;  $R^2 = 0.264$ ;  $F_{1,187} = 67.23$ ;  $p = 0$ ;  $n = 189$ .)

| Parameters | Estimate | S.E.   | Lower 95% C.I. | Upper 95% C.I. | <i>t</i> -value | <i>P</i> -value |
|------------|----------|--------|----------------|----------------|-----------------|-----------------|
| $c_0$      | -0.7848  | 0.1174 | -1.015         | -0.555         | -6.684          | 0.000           |

|       |        |        |       |       |        |       |
|-------|--------|--------|-------|-------|--------|-------|
| $c_1$ | 2.0188 | 0.2462 | 1.536 | 2.501 | 8.1995 | 0.000 |
|-------|--------|--------|-------|-------|--------|-------|

Predicted seasonal density-dependent structure:

|          |        |       |        |       |        |       |
|----------|--------|-------|--------|-------|--------|-------|
| $a_{w1}$ | 1.785  | 0.117 | 1.556  | 2.014 | 15.256 | 0.000 |
| $a_{s1}$ | -0.234 | 0.362 | -0.944 | 0.476 | -0.646 | 0.519 |

**(2) Delayed density dependencies ( $\alpha_2$  regressed on  $\tau$ ).**

(Residual error = 0.270 ;  $df = 187$ ;  $R^2 = 0.0262$ ;  $F_{1,187} = 5.034$ ;  $p = 0.0260$ ;  $n = 189$ .)

| Parameters | Estimate | S.E.   | Lower 95% C.I. | Upper 95% C.I. | $t$ -value | $P$ -value |
|------------|----------|--------|----------------|----------------|------------|------------|
| $d_0$      | -0.3879  | 0.1114 | -0.606         | -0.170         | -3.483     | 0.0006     |
| $d_1$      | 0.524    | 0.2335 | 0.066          | 0.982          | 2.2437     | 0.026      |

Predicted seasonal density-dependent structure:

|          |        |       |        |        |        |       |
|----------|--------|-------|--------|--------|--------|-------|
| $a_{w2}$ | 0.388  | 0.111 | 0.170  | 0.606  | 3.495  | 0.001 |
| $a_{s2}$ | -0.912 | 0.344 | -1.586 | -0.238 | -2.651 | 0.009 |

**Supplementary table 3:** Optimum values found for the parameters  $b_2$ - $b_3$  when maximizing the product (left column) and the average (right column) of the  $R^2$  values of the two regressions  $\alpha_1 = c_0 + c_0\tau$  and  $\alpha_2 = d_0 + d_0\tau$ . (See Appendix B for further explanation. The resulting estimates of  $c_0$ ,  $c_1$ ,  $d_0$  and  $d_1$  are given in supplementary table 2.)

|                                                            | Criterion             |                        |
|------------------------------------------------------------|-----------------------|------------------------|
|                                                            | $R^2$ product         | $R^2$ average          |
| <b>Optimum values of <math>b_0</math>-<math>b_3</math></b> |                       |                        |
| $b_0$                                                      | 0.915                 | 0.999                  |
| $b_1$                                                      | $-8.01 \cdot 10^{-3}$ | $-10.77 \cdot 10^{-3}$ |
| $b_2$                                                      | $6.01 \cdot 10^{-4}$  | $-5.99 \cdot 10^{-3}$  |
| $b_3$                                                      | $-1.08 \cdot 10^{-5}$ | $4.62 \cdot 10^{-5}$   |

**$R^2$  for regressions**

(equations  $g_{we}$  and  $g_{sn}$ )

|                            | intercept const. | regression coeff. |
|----------------------------|------------------|-------------------|
| $\alpha_1 = c_0 + c_0\tau$ | 0.190            | 0.260             |
| $\alpha_2 = d_0 + d_0\tau$ | 0.062            | 0.026             |
